# Supplementary material for: Downpour dynamics: outsized impacts of storm events on unprocessed atmospheric nitrate export in an urban watershed
Source: Copernicus journal article supplement (doi:10.5194/bg-20-2485-2023), 2023-06-29
Supplement: Supplementary file 1 [file bg-20-2485-2023-supplement.pdf]

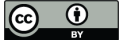

*Supplement of*

## **Downpour dynamics: outsized impacts of storm events on unprocessed atmospheric nitrate export in an urban watershed**

**Joel T. Bostic et al.**

*Correspondence to:* Joel T. Bostic ([jbostic@umces.edu](mailto:jbostic@umces.edu))

The copyright of individual parts of the supplement might differ from the article licence.

**Supplementary Material for Downpour Dynamics: Outsized impacts of storm events on unprocessed atmospheric nitrate export**

*Supplementary tables*

Table S1. Rainfall depth and chemistry for sampled events.

| Date     | Rainfall (cm) |      | NO <sub>3</sub> <sup>-</sup> (mg N L <sup>-1</sup> ) |      | NO <sub>3</sub> <sup>-</sup> (g N ha <sup>-1</sup> ) |     | δ <sup>15</sup> N (‰) |            | δ <sup>18</sup> O (‰) |            | Δ <sup>17</sup> O (‰) |            | δ <sup>18</sup> O <sub>H2O</sub> (‰) |             |
|----------|---------------|------|------------------------------------------------------|------|------------------------------------------------------|-----|-----------------------|------------|-----------------------|------------|-----------------------|------------|--------------------------------------|-------------|
|          | GUN           | GWN  | GUN                                                  | GWN  | GUN                                                  | GWN | GUN                   | GWN        | GUN                   | GWN        | GUN                   | GWN        | GUN                                  | GWN         |
| 9/9/18   | 4.90          | 3.60 | 0.08                                                 | 0.07 | 38                                                   | 26  | n/a                   | n/a        | 56.5 ± 0.2            | 58.8 ± 0.9 | 19.8 ± 0.4            | 21.3 ± 0.5 | -7.6 ± 0.2                           | -7.2 ± 0.2  |
| 10/27/18 | 1.90          | 2.30 | 0.09                                                 | 0.10 | 18                                                   | 22  | -3.2 ± 0.3            | -4.3 ± 0.4 | 56.5 ± 0.5            | 55.1 ± 0.7 | 19.8 ± 0.5            | 19.3 ± 0.4 | -14.9 ± 0.2                          | -15.0 ± 0.2 |
| 12/28/18 | 3.30          | 3.00 | 0.12                                                 | 0.17 | 38                                                   | 52  | -1.4 ± 0.3            | -1.9 ± 0.5 | 56.6 ± 0.8            | 66.7 ± 0.9 | 21.4 ± 0.2            | 24.9 ± 0.4 | -6.0 ± 0.2                           | -5.7 ± 0.2  |
| 3/21/19  | 8.10          | 6.80 | 0.05                                                 | 0.07 | 44                                                   | 49  |                       | -1.6 ± 1.4 | 48.0 ± 0.6            | 53.7 ± 0.9 | 20.5 ± 0.4            | 20.4 ± 0.6 | -11.8 ± 0.2                          | -11.6 ± 0.2 |
| 5/4/19   | 3.90          | 3.80 | 0.13                                                 | 0.20 | 52                                                   | 77  | -5.8 ± 0.2            | -2.2 ± 0.6 | 63.7 ± 0.5            | 69.6 ± 0.5 | 23.1 ± 0.4            | 23.0 ± 0.7 | -5.5 ± 0.2                           | -4.8 ± 0.2  |
| 7/12/19  | 3.00          | 3.80 | 0.26                                                 | 0.17 | 79                                                   | 63  | -5.5 ± 0.3            | -8.7 ± 0.4 | 66.9 ± 0.7            | 53.4 ± 0.1 | 22.9 ± 0.2            | 16.4 ± 0.6 | -4.8 ± 0.2                           | -5.0 ± 0.2  |
| 7/22/19  | 5.30          | 2.00 | 0.17                                                 | 0.16 | 88                                                   | 31  | -4.4 ± 0.2            | -4.8 ± 0.8 | 58.3 ± 0.2            | 48.9 ± 0.5 | 18.4 ± 0.4            | 13.6 ± 0.5 | -6.8 ± 0.2                           | -6.3 ± 0.2  |
| 10/16/19 | 3.60          | 3.90 | 0.06                                                 | 0.05 | 20                                                   | 21  | -8.0 ± 0.5            | -6.9 ± 0.7 | 56.8 ± 0.3            | 51.2 ± 0.6 | 18.8 ± 0.4            | 19.0 ± 0.7 | -10.7 ± 0.2                          | -11.4 ± 0.2 |

Rainfall depth is the spatially averaged mean for the entire watershed.

Table S2. Hydrologic characteristics of sampled storm events and antecedent conditions.

| Date     | Q <sub>mean</sub> (mm hr <sup>-1</sup> ) |      | Q <sub>median</sub> (mm hr <sup>-1</sup> ) |      | Q <sub>min</sub> (mm hr <sup>-1</sup> ) |      | Q <sub>max</sub> (mm hr <sup>-1</sup> ) |      | Q <sub>EventSampled</sub> (cm) |      | Q <sub>EventTotal</sub> (cm) |      | 7-day antecedent Q (cm) |      | δ <sup>18</sup> O-H <sub>2</sub> O Baseflow |      | δ <sup>18</sup> O-H <sub>2</sub> O Peak |      | f <sub>Event Water Peak</sub> |      |
|----------|------------------------------------------|------|--------------------------------------------|------|-----------------------------------------|------|-----------------------------------------|------|--------------------------------|------|------------------------------|------|-------------------------|------|---------------------------------------------|------|-----------------------------------------|------|-------------------------------|------|
|          | GUN                                      | GWN  | GUN                                        | GWN  | GUN                                     | GWN  | GUN                                     | GWN  | GUN                            | GWN  | GUN                          | GWN  | GUN                     | GWN  | GUN                                         | GWN  | GUN                                     | GWN  | GUN                           | GWN  |
| 9/9/18   | 0.33                                     | 1.37 | 0.36                                       | 1.59 | 0.11                                    | 0.40 | 0.41                                    | 1.77 | 0.95                           | 2.22 | 1.50                         | 2.90 | 1.31                    | 2.07 | n/a                                         | n/a  | -7.1                                    | -6.9 | n/a                           | n/a  |
| 10/27/18 | 0.08                                     | 0.24 | 0.08                                       | 0.23 | 0.06                                    | 0.04 | 0.11                                    | 0.42 | 0.25                           | 0.41 | 0.23                         | 0.54 | 0.80                    | 0.60 | -7.2                                        | -7.7 | -7.8                                    | -    | 0.08                          | 0.49 |
|          |                                          |      |                                            |      |                                         |      |                                         |      |                                |      |                              |      |                         |      |                                             |      | 11.3                                    |      | ±                             | ±    |
|          |                                          |      |                                            |      |                                         |      |                                         |      |                                |      |                              |      |                         |      |                                             |      |                                         |      | 0.09                          | 0.12 |
| 12/28/18 | 0.22                                     | 0.48 | 0.23                                       | 0.39 | 0.12                                    | 0.06 | 0.38                                    | 1.14 | 0.82                           | 1.26 | 0.89                         | 1.33 | 2.90                    | 2.01 | -7.3                                        | -7.8 | -7.3                                    | -6.8 | 0.00                          | 0.48 |
|          |                                          |      |                                            |      |                                         |      |                                         |      |                                |      |                              |      |                         |      |                                             |      |                                         |      | ±                             | ±    |
|          |                                          |      |                                            |      |                                         |      |                                         |      |                                |      |                              |      |                         |      |                                             |      |                                         |      | 0.61                          | 0.27 |
| 3/21/19  | 0.25                                     | 0.66 | 0.21                                       | 0.54 | 0.09                                    | 0.05 | 0.76                                    | 2.00 | 2.16                           | 2.60 | 2.35                         | 2.92 | 1.67                    | 1.02 | -7.7                                        | -7.7 | -9.1                                    | -    | 0.34                          | 0.79 |
|          |                                          |      |                                            |      |                                         |      |                                         |      |                                |      |                              |      |                         |      |                                             |      |                                         |      | ±                             | ±    |
|          |                                          |      |                                            |      |                                         |      |                                         |      |                                |      |                              |      |                         |      |                                             |      |                                         |      | 0.17                          | 0.25 |
| 5/4/19   | 0.14                                     | 0.38 | 0.12                                       | 0.32 | 0.08                                    | 0.05 | 0.22                                    | 0.94 | 0.53                           | 1.23 | 0.56                         | 1.27 | 1.29                    | 0.79 | -7.6                                        | -6.1 | -7.4                                    | -5   | 0.10                          | 0.85 |
|          |                                          |      |                                            |      |                                         |      |                                         |      |                                |      |                              |      |                         |      |                                             |      |                                         |      | ±                             | ±    |
|          |                                          |      |                                            |      |                                         |      |                                         |      |                                |      |                              |      |                         |      |                                             |      |                                         |      | 0.36                          | 0.40 |
| 7/12/19  | 0.17                                     | 0.75 | 0.14                                       | 0.45 | 0.07                                    | 0.04 | 0.33                                    | 1.99 | 0.26                           | 1.25 | 0.29                         | 1.38 | 0.92                    | 2.52 | -8                                          | -7.1 | -7.4                                    | -5.0 | 0.19                          | 1.00 |
|          |                                          |      |                                            |      |                                         |      |                                         |      |                                |      |                              |      |                         |      |                                             |      |                                         |      | ±                             | ±    |
|          |                                          |      |                                            |      |                                         |      |                                         |      |                                |      |                              |      |                         |      |                                             |      |                                         |      | 0.22                          | 0.29 |
| 7/22/19  | 0.14                                     | 0.16 | 0.12                                       | 0.11 | 0.05                                    | 0.03 | 0.24                                    | 0.51 | 0.32                           | 0.44 | 0.33                         | 0.43 | 1.11                    | 1.02 | -7.3                                        | -7.3 | -6.7                                    | -6.3 | 1.06                          | 0.96 |
|          |                                          |      |                                            |      |                                         |      |                                         |      |                                |      |                              |      |                         |      |                                             |      |                                         |      | ±                             | ±    |
|          |                                          |      |                                            |      |                                         |      |                                         |      |                                |      |                              |      |                         |      |                                             |      |                                         |      | 1.39                          | 0.64 |
| 10/16/19 | 0.05                                     | 0.25 | 0.04                                       | 0.13 | 0.02                                    | 0.01 | 0.09                                    | 0.81 | 0.12                           | 0.57 | 0.09                         | 0.57 | 0.33                    | 0.20 | -7.9                                        | -7.6 | -8.4                                    | -    | 0.18                          | 0.72 |
|          |                                          |      |                                            |      |                                         |      |                                         |      |                                |      |                              |      |                         |      |                                             |      |                                         |      | ±                             | ±    |
|          |                                          |      |                                            |      |                                         |      |                                         |      |                                |      |                              |      |                         |      |                                             |      |                                         |      | 0.26                          | 0.24 |

Q<sub>EventSampled</sub> equals the discharge representing the duration of sampling. Q<sub>EventTotal</sub> equals the total event discharge as quantified using the constant slope method (Dingman, 1994). f<sub>Event Water Peak</sub> = fraction of event water at peak discharge.

Table S3. Water chemistry of sampled storm events. Concentrations and isotope ratios are discharge-weighted means (i.e., EMC, EMV).

| Date     | NO <sub>3</sub> <sup>-</sup> (mg N L <sup>-1</sup> ) |      | NO <sub>3</sub> <sup>-</sup> Atm (mg N L <sup>-1</sup> ) |      | NO <sub>3</sub> <sup>-</sup> (g N ha <sup>-1</sup> ) |     | NO <sub>3</sub> <sup>-</sup> Atm (g N ha <sup>-1</sup> ) |     | δ <sup>15</sup> N (‰) |     | δ <sup>15</sup> N <sub>Terr</sub> (‰) |     | δ <sup>18</sup> O (‰) |      | δ <sup>18</sup> O <sub>Terr</sub> (‰) |      | Δ <sup>17</sup> O (‰) |     |
|----------|------------------------------------------------------|------|----------------------------------------------------------|------|------------------------------------------------------|-----|----------------------------------------------------------|-----|-----------------------|-----|---------------------------------------|-----|-----------------------|------|---------------------------------------|------|-----------------------|-----|
|          | GUN                                                  | GWN  | GUN                                                      | GWN  | GUN                                                  | GWN | GUN                                                      | GWN | GUN                   | GWN | GUN                                   | GWN | GUN                   | GWN  | GUN                                   | GWN  | GUN                   | GWN |
| 9/9/18   | 1.68                                                 | 0.39 | 0.03                                                     | 0.02 | 163                                                  | 83  | 3                                                        | 5   | 5.9                   | 5.5 | 6.0                                   | 6.0 | 1.7                   | 6.0  | 0.5                                   | 2.1  | 0.5                   | 1.2 |
| 10/27/18 | 2.96                                                 | 1.11 | 0.06                                                     | 0.06 | 77                                                   | 48  | 2                                                        | 2   | 6.3                   | 6.6 | 6.3                                   | 6.7 | 2.3                   | 5.9  | 1.1                                   | 2.7  | 0.4                   | 1.2 |
| 12/28/18 | 2.52                                                 | 0.68 | 0.03                                                     | 0.05 | 213                                                  | 87  | 2                                                        | 7   | 6.2                   | 5.0 | 6.4                                   | 5.2 | 2.3                   | 7.6  | 1.6                                   | 1.9  | 0.3                   | 2.0 |
| 3/21/19  | 2.75                                                 | 0.59 | 0.07                                                     | 0.05 | 737                                                  | 160 | 18                                                       | 13  | 5.1                   | 3.6 | 5.5                                   | 3.7 | 2.4                   | 5.3  | 2.8                                   | -1.1 | 0.5                   | 2.0 |
| 5/4/19   | 2.88                                                 | 0.63 | 0.03                                                     | 0.07 | 161                                                  | 80  | 2                                                        | 9   | 5.8                   | 4.5 | 5.7                                   | 4.7 | 3.5                   | 9.3  | 3.6                                   | 0.9  | 0.2                   | 2.5 |
| 7/12/19  | 2.17                                                 | 0.48 | 0.08                                                     | 0.10 | 58                                                   | 61  | 2                                                        | 13  | 6.2                   | 2.8 | 6.4                                   | 6.1 | 4.9                   | 14.4 | 2.3                                   | -1.8 | 0.9                   | 3.8 |
| 7/22/19  | 1.94                                                 | 1.07 | 0.05                                                     | 0.10 | 66                                                   | 36  | 2                                                        | 4   | 5.8                   | 6.6 | 5.9                                   | 7.1 | 4.7                   | 7.2  | 2.9                                   | 1.8  | 0.5                   | 1.4 |
| 10/16/19 | 2.58                                                 | 0.89 | 0.07                                                     | 0.09 | 31                                                   | 52  | 1                                                        | 5   | 6.4                   | 5.0 | 6.7                                   | 5.8 | 4.3                   | 7.9  | 2.6                                   | 2.1  | 0.5                   | 2.0 |

Table S4. Nitrate concentration and isotope data and discharge for individual storm samples.

| Date and Time | Discharge (m <sup>3</sup> s <sup>-1</sup> ) | Event | Site | NO <sub>3</sub> <sup>-</sup> (mg N L <sup>-1</sup> ) | δ <sup>15</sup> N (‰) | δ <sup>18</sup> O (‰) | Δ <sup>17</sup> O (‰) |
|---------------|---------------------------------------------|-------|------|------------------------------------------------------|-----------------------|-----------------------|-----------------------|
| 9/9/18 7:30   | 12.9                                        | 1     | GUN  | 1.988                                                | 7.0                   | 4.8                   | 0.6                   |
| 9/9/18 8:45   | 16.1                                        | 1     | GUN  | 1.8859                                               | 6.8                   | 4.6                   | 0.1                   |
| 9/9/18 10:00  | 20.3                                        | 1     | GUN  | 1.9059                                               | 6.8                   | 4.1                   | 0.4                   |
| 9/9/18 11:15  | 25.3                                        | 1     | GUN  | 2.0295                                               | 6.6                   | 2.6                   | 0.1                   |
| 9/9/18 12:30  | 32.3                                        | 1     | GUN  | 2.0581                                               | 6.4                   | 2.6                   | 0.1                   |
| 9/9/18 13:45  | 39.9                                        | 1     | GUN  | 1.9714                                               | 6.2                   | 2.8                   | 0.3                   |
| 9/9/18 15:00  | 42.8                                        | 1     | GUN  | 1.8393                                               | 6.1                   | 2.9                   | 0.1                   |
| 9/9/18 16:15  | 44.2                                        | 1     | GUN  | 1.5943                                               | 6.1                   | 2.5                   | 0.9                   |
| 9/9/18 17:30  | 45.0                                        | 1     | GUN  | 1.5003                                               | 5.2                   | 1.9                   | 0.2                   |
| 9/9/18 18:45  | 46.2                                        | 1     | GUN  | 1.555                                                | 5.5                   | 1.5                   | 0.3                   |
| 9/9/18 20:00  | 47.6                                        | 1     | GUN  | 1.5427                                               | 5.6                   | 1.0                   | 0.2                   |
| 9/9/18 21:15  | 47.3                                        | 1     | GUN  | 1.5613                                               | 6.8                   | 2.4                   | 0.2                   |
| 9/9/18 22:30  | 45.6                                        | 1     | GUN  | 1.5502                                               | 5.4                   | 2.5                   | 0.2                   |
| 9/10/18 1:00  | 43.9                                        | 1     | GUN  | 1.5403                                               | 5.9                   | 1.1                   | 1.0                   |
| 9/10/18 3:30  | 41.9                                        | 1     | GUN  | 1.5933                                               | 5.9                   | -0.5                  | 0.9                   |
| 9/10/18 9:45  | 34.8                                        | 1     | GUN  | 1.7172                                               | 5.9                   | 1.4                   | 0.3                   |
| 9/10/18 12:15 | 34.0                                        | 1     | GUN  | 1.7746                                               | 6.0                   | 1.3                   | 0.8                   |
| 9/9/18 9:00   | 39.1                                        | 1     | GWN  | 0.3751                                               | 6.2                   | 8.9                   | 1.9                   |
| 9/9/18 9:45   | 40.5                                        | 1     | GWN  | 0.3731                                               | 4.4                   | 6.0                   | 1.6                   |
| 9/9/18 10:30  | 41.1                                        | 1     | GWN  | 0.38                                                 | 4.4                   | 5.4                   | 1.9                   |
| 9/9/18 11:15  | 41.3                                        | 1     | GWN  | 0.3784                                               | 5.6                   | 6.1                   | 1.3                   |
| 9/9/18 12:00  | 40.5                                        | 1     | GWN  | 0.3858                                               | 5.2                   | 6.3                   | 1.3                   |
| 9/9/18 12:45  | 39.9                                        | 1     | GWN  | 0.3898                                               | 4.9                   | 5.5                   | 1.3                   |
| 9/9/18 13:30  | 39.9                                        | 1     | GWN  | 0.3923                                               | 5.6                   | 6.1                   | 0.7                   |
| 9/9/18 14:15  | 38.5                                        | 1     | GWN  | 0.3941                                               | 6.1                   | 6.4                   | 1.2                   |

|                   |      |   |     |        |     |     |      |
|-------------------|------|---|-----|--------|-----|-----|------|
| 9/9/18 15:00      | 37.9 | 1 | GWN | 0.4013 | 6.0 | 5.6 | 1.0  |
| 9/9/18 15:45      | 37.7 | 1 | GWN | 0.3907 | 6.3 | 6.5 | 1.5  |
| 9/9/18 16:30      | 37.4 | 1 | GWN | 0.385  | 7.6 | NA  | 1.0  |
| 9/9/18 17:15      | 36.5 | 1 | GWN | 0.3778 | 5.4 | 5.5 | 1.3  |
| 9/9/18 18:00      | 36.8 | 1 | GWN | 0.3775 | 6.4 | 6.3 | 1.5  |
| 9/9/18 20:15      | 28.2 | 1 | GWN | 0.3728 | 3.9 | 4.5 | 0.7  |
| 9/9/18 21:45      | 15.3 | 1 | GWN | 0.4287 | NA  | NA  | 0.5  |
| 9/9/18 23:15      | 11.0 | 1 | GWN | 0.4714 | NA  | NA  | 0.8  |
| 10/26/18<br>15:15 | 6.5  | 3 | GUN | 3.1987 |     |     |      |
|                   |      |   |     |        | 6.5 | 1.8 | 0.7  |
| 10/27/18 0:00     | 7.1  | 3 | GUN | 3.1075 | 6.6 | 2.1 | 0.0  |
| 10/27/18 2:00     | 7.6  | 3 | GUN | 3.0399 | 6.6 | 1.1 | 0.0  |
| 10/27/18 4:00     | 8.4  | 3 | GUN | 2.9761 | 6.6 | 1.7 | 0.8  |
| 10/27/18 6:00     | 9.4  | 3 | GUN | 2.9277 | 6.6 | 1.8 | 0.0  |
| 10/27/18 8:00     | 11.0 | 3 | GUN | 2.8924 | 6.5 | 1.7 | 0.5  |
| 10/27/18<br>10:00 | 12.4 | 3 | GUN | 2.9341 |     |     |      |
|                   |      |   |     |        | 6.1 | 3.5 | 1.0  |
| 10/27/18<br>12:00 | 13.0 | 3 | GUN | 2.9789 |     |     |      |
|                   |      |   |     |        | 5.7 | 2.4 | 0.6  |
| 10/27/18<br>14:00 | 13.1 | 3 | GUN | 2.9423 |     |     |      |
|                   |      |   |     |        | 5.4 | 1.7 | 0.7  |
| 10/27/18<br>16:00 | 12.9 | 3 | GUN | 2.8636 |     |     |      |
|                   |      |   |     |        | 5.8 | 3.4 | 0.9  |
| 10/27/18<br>18:00 | 12.7 | 3 | GUN | 2.7768 |     |     |      |
|                   |      |   |     |        | 6.6 | 2.4 | -0.1 |
| 10/27/18<br>20:00 | 12.8 | 3 | GUN | 2.6858 |     |     |      |
|                   |      |   |     |        | 6.7 | 3.0 | -0.2 |
| 10/26/18<br>21:45 | 0.9  | 3 | GWN | 1.8838 |     |     |      |
|                   |      |   |     |        | 7.4 | 4.1 | 0.7  |
| 10/26/18<br>23:15 | 1.9  | 3 | GWN | 1.4681 |     |     |      |
|                   |      |   |     |        | 7.3 | 6.7 | 1.4  |

|                   |      |   |     |        |     |     |      |
|-------------------|------|---|-----|--------|-----|-----|------|
| 10/27/18 0:45     | 2.9  | 3 | GWN | 1.4609 | 7.2 | 6.5 | 0.6  |
| 10/27/18 2:15     | 4.3  | 3 | GWN | 1.0902 | 6.8 | 7.2 | 1.1  |
| 10/27/18 3:45     | 6.1  | 3 | GWN | 1.1555 | 6.7 | 5.9 | 1.2  |
| 10/27/18 5:15     | 7.6  | 3 | GWN | 1.2945 | 6.8 | 5.7 | 0.8  |
| 10/27/18 6:45     | 9.7  | 3 | GWN | 1.1601 | 7.0 | 5.5 | 1.0  |
| 10/27/18<br>13:30 | 4.5  | 3 | GWN | 0.7866 | 5.4 | 6.2 | 1.8  |
| 10/27/18<br>15:00 | 4.0  | 3 | GWN | 0.7575 | 6.0 | 5.7 | 1.2  |
| 12/27/18<br>18:00 | 14.0 | 4 | GUN | 3.0308 | 5.3 | 1.8 | 0.0  |
| 12/28/18 1:00     | 14.0 | 4 | GUN | 3.0378 | 6.9 | 1.6 | 0.3  |
| 12/28/18 3:00     | 14.0 | 4 | GUN | 3.0423 | 7.6 | 2.8 | 0.1  |
| 12/28/18 5:00     | 14.6 | 4 | GUN | 2.9797 | 5.4 | 2.7 | -0.3 |
| 12/28/18 7:00     | 16.7 | 4 | GUN | 2.7953 | 5.5 | 2.5 | 0.6  |
| 12/28/18 9:00     | 21.9 | 4 | GUN | 2.5896 | 5.3 | 1.4 | 0.3  |
| 12/28/18<br>11:00 | 32.6 | 4 | GUN | 2.6074 | 5.5 | 2.2 | 0.2  |
| 12/28/18<br>13:00 | 43.6 | 4 | GUN | 2.5176 | 5.5 | 3.6 | 0.5  |
| 12/28/18<br>15:00 | 42.5 | 4 | GUN | 2.2658 | 5.0 | 0.3 | -0.3 |
| 12/28/18<br>17:00 | 36.8 | 4 | GUN | 2.1428 | 5.5 | 3.1 | 0.2  |
| 12/28/18<br>19:00 | 33.1 | 4 | GUN | 2.1442 | 6.7 | 2.5 | 0.4  |
| 12/28/18<br>21:00 | 31.4 | 4 | GUN | 2.2302 | 6.7 | 2.6 | 0.5  |
| 12/28/18<br>23:00 | 29.7 | 4 | GUN | 2.3222 | 6.3 | 2.6 | 0.4  |
| 12/29/18 1:00     | 28.2 | 4 | GUN | 2.4008 | 8.5 | 3.0 | 0.3  |

|                   |      |   |     |        |     |      |      |
|-------------------|------|---|-----|--------|-----|------|------|
| 12/29/18 3:00     | 27.1 | 4 | GUN | 2.462  | 8.0 | 3.1  | 0.4  |
| 12/29/18 5:00     | 26.1 | 4 | GUN | 2.5027 | 7.2 | 1.4  | -0.1 |
| 12/29/18 7:00     | 25.2 | 4 | GUN | 2.5435 | 5.7 | 2.2  | 0.8  |
| 12/28/18 3:00     | 1.4  | 4 | GWN | 2.1313 | 6.7 | 4.7  | 0.5  |
| 12/28/18 4:00     | 1.6  | 4 | GWN | 2.0776 | 7.0 | 5.7  | 0.6  |
| 12/28/18 5:00     | 3.1  | 4 | GWN | 1.3976 | 6.1 | 8.9  | 1.8  |
| 12/28/18 6:00     | 6.3  | 4 | GWN | 1.3746 | 5.8 | 8.8  | 2.1  |
| 12/28/18 7:00     | 8.2  | 4 | GWN | 1.0737 | 6.1 | 10.3 | 3.0  |
| 12/28/18 8:00     | 13.5 | 4 | GWN | 0.9234 | 5.9 | 9.1  | 2.0  |
| 12/28/18 9:00     | 20.3 | 4 | GWN | 1.0286 | 5.8 | 9.0  | 1.9  |
| 12/28/18<br>10:00 | 23.3 | 4 | GWN | 0.9465 | 5.4 | 7.2  | 1.4  |
| 12/28/18<br>11:00 | 25.7 | 4 | GWN | 0.754  | 5.3 | 8.6  | 1.8  |
| 12/28/18<br>12:00 | 26.3 | 4 | GWN | 0.5106 | 6.8 | 10.1 | 2.4  |
| 12/28/18<br>13:00 | 24.0 | 4 | GWN | 0.4383 | 3.9 | 9.0  | 2.8  |
| 12/28/18<br>14:00 | 20.8 | 4 | GWN | 0.4076 | 4.1 | 9.4  | 2.7  |
| 12/28/18<br>15:00 | 16.7 | 4 | GWN | 0.4152 | 3.2 | 6.6  | 2.2  |
| 12/28/18<br>16:00 | 14.1 | 4 | GWN | 0.4332 | 2.9 | 6.5  | 2.2  |
| 12/28/18<br>17:00 | 12.5 | 4 | GWN | 0.4533 | 3.7 | 6.5  | 2.2  |
| 12/28/18<br>18:00 | 11.2 | 4 | GWN | 0.4833 | 4.8 | 6.6  | 1.9  |
| 12/28/18<br>19:00 | 10.0 | 4 | GWN | 0.5135 | 4.4 | 6.0  | 1.8  |



|                   |      |   |     |        |     |     |      |
|-------------------|------|---|-----|--------|-----|-----|------|
| 12/28/18<br>21:00 | 8.2  | 4 | GWN | 0.5767 | 5.1 | 4.9 | 1.8  |
| 12/28/18<br>23:00 | 5.9  | 4 | GWN | 0.6481 | 5.2 | 4.7 | 1.4  |
| 12/29/18 1:00     | 4.7  | 4 | GWN | 0.7176 | 5.8 | 6.5 | 1.2  |
| 12/29/18 3:00     | 4.0  | 4 | GWN | 0.7715 | 5.6 | 4.2 | 1.2  |
| 12/29/18 5:00     | 3.6  | 4 | GWN | 0.826  | 6.0 | 4.7 | 0.9  |
| 3/20/19 19:45     | 10.3 | 6 | GUN | 3.2293 | 6.1 | 3.3 | 0.5  |
| 3/21/19 8:00      | 10.8 | 6 | GUN | 3.2064 | 5.9 | 1.9 | 0.7  |
| 3/21/19 12:00     | 12.9 | 6 | GUN | 3.092  | 6.4 | 2.5 | 0.5  |
| 3/21/19 16:00     | 19.5 | 6 | GUN | 2.8435 | 7.5 | 2.3 | 0.2  |
| 3/21/19 18:00     | 25.2 | 6 | GUN | 2.7929 | 4.7 | 2.6 | 0.5  |
| 3/21/19 20:00     | 32.6 | 6 | GUN | 2.4956 | 4.3 | 3.0 | 0.4  |
| 3/22/19 11:45     | 67.1 | 6 | GUN | 2.4073 | 5.1 | 2.1 | 0.9  |
| 3/22/19 19:45     | 46.2 | 6 | GUN | 2.7163 | 5.0 | 2.5 | 0.5  |
| 3/23/19 7:45      | 32.6 | 6 | GUN | 2.8651 | 5.6 | 2.2 | 0.3  |
| 3/23/19 19:45     | 26.1 | 6 | GUN | 2.924  | 5.5 | 2.0 | 0.5  |
| 3/24/19 7:45      | 22.0 | 6 | GUN | 3.0226 | 4.6 | 2.3 | 0.6  |
| 3/24/19 19:45     | 20.0 | 6 | GUN | 3.0558 | 4.0 | 3.1 | 0.1  |
| 3/20/19 18:30     | 1.3  | 6 | GWN | 2.0393 | 6.8 | 2.9 | 0.9  |
| 3/21/19 8:00      | 2.2  | 6 | GWN | 1.8217 | 6.5 | 3.5 | -0.2 |
| 3/21/19 11:00     | 4.9  | 6 | GWN | 1.3663 | 6.2 | 5.2 | 2.0  |
| 3/21/19 14:00     | 14.5 | 6 | GWN | 0.9246 | 5.5 | 5.0 | 1.5  |
| 3/21/19 17:00     | 18.8 | 6 | GWN | 0.7454 | 4.6 | 4.7 | 0.6  |
| 3/21/19 20:00     | 32.8 | 6 | GWN | 0.3981 | 2.5 | 5.9 | 2.0  |
| 3/21/19 23:00     | 44.7 | 6 | GWN | 0.3905 | 1.9 | 6.0 | 2.1  |
| 3/22/19 0:30      | 46.7 | 6 | GWN | 0.3821 | 3.2 | 6.7 | 2.9  |
| 3/22/19 2:00      | 43.9 | 6 | GWN | 0.4138 | 2.7 | 6.1 | 2.6  |

|              |      |   |     |        |     |      |      |
|--------------|------|---|-----|--------|-----|------|------|
| 3/22/19 3:30 | 29.2 | 6 | GWN | 0.4721 | 2.6 | 6.3  | 2.4  |
| 3/22/19 6:30 | 19.7 | 6 | GWN | 0.5358 | 5.4 | 0.9  | 2.1  |
| 3/22/19 9:30 | 11.5 | 6 | GWN | 0.6429 | 5.7 | 5.0  | 2.0  |
| 5/4/19 18:00 | 9.7  | 8 | GUN | 3.1931 | 6.1 | 3.7  | 0.1  |
| 5/5/19 6:00  | 10.1 | 8 | GUN | 3.1464 | 6.5 | 3.2  | 0.1  |
| 5/5/19 9:00  | 10.8 | 8 | GUN | 3.0147 | 4.9 | 2.6  | 0.3  |
| 5/5/19 10:30 | 12.8 | 8 | GUN | 2.81   | 4.4 | 2.0  | 0.5  |
| 5/5/19 13:30 | 15.1 | 8 | GUN | 2.8875 | 4.4 | 2.6  | 0.7  |
| 5/5/19 15:00 | 20.6 | 8 | GUN | 3.0023 | 5.0 | 3.3  | 0.2  |
| 5/5/19 16:30 | 21.7 | 8 | GUN | 3.0624 | 6.7 | 3.8  | 0.7  |
| 5/5/19 18:00 | 21.4 | 8 | GUN | 2.9315 | 4.2 | 4.0  | 0.5  |
| 5/5/19 19:30 | 22.1 | 8 | GUN | 2.6489 | 5.5 | 4.1  | 0.1  |
| 5/5/19 21:00 | 22.6 | 8 | GUN | 2.5525 | 6.0 | 3.7  | -0.1 |
| 5/5/19 22:30 | 23.9 | 8 | GUN | 2.5971 | 5.2 | 4.6  | -0.1 |
| 5/6/19 0:00  | 25.9 | 8 | GUN | 2.6583 | 7.1 | 3.1  | 0.2  |
| 5/6/19 1:30  | 25.6 | 8 | GUN | 2.6873 | 5.8 | 4.2  | 0.1  |
| 5/6/19 3:00  | 24.2 | 8 | GUN | 2.7133 | 6.0 | 3.8  | -0.1 |
| 5/6/19 4:30  | 22.3 | 8 | GUN | 2.7509 | 6.4 | 3.4  | 0.3  |
| 5/6/19 6:00  | 21.1 | 8 | GUN | 2.8211 | 6.2 | 4.0  | 0.1  |
| 5/6/19 7:30  | 20.2 | 8 | GUN | 2.892  | 6.2 | 3.2  | 1.1  |
| 5/4/19 23:00 | 1.1  | 8 | GWN | 1.2949 | 7.6 | 7.4  | 1.3  |
| 5/5/19 1:00  | 2.5  | 8 | GWN | 1.2467 | 7.5 | 7.9  | 1.8  |
| 5/5/19 3:00  | 5.0  | 8 | GWN | 1.0778 | 3.3 | 12.8 | 3.5  |
| 5/5/19 4:00  | 6.1  | 8 | GWN | 1.1079 | 5.4 | 10.0 | 3.1  |
| 5/5/19 6:00  | 5.9  | 8 | GWN | 1.1589 | 5.5 | 8.2  | 2.5  |
| 5/5/19 8:00  | 4.7  | 8 | GWN | 1.0437 | 5.6 | 7.3  | 3.6  |
| 5/5/19 9:00  | 5.9  | 8 | GWN | 0.8227 | 4.4 | 12.5 | 4.2  |
| 5/5/19 10:00 | 7.5  | 8 | GWN | 0.8122 | 5.0 | 12.1 | 3.8  |

|               |      |   |     |        |     |      |     |
|---------------|------|---|-----|--------|-----|------|-----|
| 5/5/19 11:00  | 12.2 | 8 | GWN | 0.7355 | 4.0 | 12.1 | 4.3 |
| 5/5/19 12:00  | 17.1 | 8 | GWN | 0.8037 | 5.3 | 9.6  | 3.1 |
| 5/5/19 13:00  | 17.8 | 8 | GWN | 0.607  | 4.6 | 11.3 | 3.1 |
| 5/5/19 14:00  | 13.1 | 8 | GWN | 0.5702 | 3.6 | 10.7 | 3.4 |
| 5/5/19 15:00  | 9.8  | 8 | GWN | 0.5467 | 3.5 | 12.2 | 3.1 |
| 5/5/19 17:00  | 7.4  | 8 | GWN | 0.4982 | 2.7 | 12.0 | 3.4 |
| 5/5/19 19:00  | 10.0 | 8 | GWN | 0.4987 | 3.5 | 10.9 | 3.3 |
| 5/5/19 21:00  | 19.3 | 8 | GWN | 0.5622 | 5.0 | 8.5  | 1.4 |
| 5/5/19 23:00  | 18.6 | 8 | GWN | 0.3928 | 4.5 | 7.9  | 1.9 |
| 5/6/19 1:00   | 10.1 | 8 | GWN | 0.3905 | 4.2 | 7.0  | 1.5 |
| 5/6/19 3:00   | 6.3  | 8 | GWN | 0.4309 | 4.1 | 6.2  | 0.8 |
| 5/6/19 7:00   | 3.7  | 8 | GWN | 0.5487 | 4.6 | 5.5  | 0.9 |
| 7/11/19 16:00 | 7.6  | 9 | GUN | 3.0092 | 6.9 | 3.8  | 0.4 |
| 7/11/19 17:00 | 8.0  | 9 | GUN | 2.8493 | 5.8 | 2.7  | 0.4 |
| 7/11/19 18:00 | 9.0  | 9 | GUN | 2.8417 | 7.4 | 3.9  | 0.5 |
| 7/11/19 19:00 | 14.2 | 9 | GUN | 2.82   | 7.0 | 3.7  | 1.2 |
| 7/11/19 20:00 | 36.5 | 9 | GUN | 2.8085 | 6.8 | 3.8  | 0.8 |
| 7/11/19 21:00 | 36.0 | 9 | GUN | 1.8034 | 5.5 | 5.8  | 0.8 |
| 7/11/19 22:00 | 29.4 | 9 | GUN | 1.5675 | 5.6 | 7.5  | 0.8 |
| 7/11/19 23:00 | 27.4 | 9 | GUN | 1.5645 | 5.9 | 6.2  | 1.3 |
| 7/12/19 0:00  | 26.0 | 9 | GUN | 1.6447 | 5.5 | 6.0  | 0.9 |
| 7/12/19 1:00  | 21.4 | 9 | GUN | 2.0192 | 5.4 | 4.5  | 0.8 |
| 7/12/19 2:00  | 17.7 | 9 | GUN | 2.3167 | 6.8 | 4.5  | 1.5 |
| 7/12/19 3:00  | 15.7 | 9 | GUN | 2.2879 | 7.1 | 4.2  | 1.1 |
| 7/12/19 5:00  | 13.6 | 9 | GUN | 2.3147 | 6.2 | 3.8  | 1.1 |
| 7/12/19 7:00  | 12.6 | 9 | GUN | 2.375  | 6.1 | 4.7  | 0.1 |
| 7/11/19 15:30 | 1.0  | 9 | GWN | 1.5733 | 7.3 | 3.0  | 0.7 |
| 7/11/19 16:15 | 1.1  | 9 | GWN | 1.5258 | 7.2 | 3.1  | 1.0 |

|               |      |    |     |        |     |      |     |
|---------------|------|----|-----|--------|-----|------|-----|
| 7/11/19 17:00 | 9.7  | 9  | GWN | 0.6233 | 5.1 | 11.8 | 3.2 |
| 7/11/19 17:45 | 27.8 | 9  | GWN | 0.6222 | 4.7 | 11.8 | 3.5 |
| 7/11/19 18:30 | 37.1 | 9  | GWN | 0.7386 | 5.4 | 10.1 | 1.8 |
| 7/11/19 19:15 | 42.5 | 9  | GWN | 0.4576 | 2.1 | 15.0 | 4.3 |
| 7/11/19 20:00 | 45.3 | 9  | GWN | 0.3847 | 1.3 | 17.2 | 5.2 |
| 7/11/19 20:45 | 46.4 | 9  | GWN | 0.3787 | 1.9 | 18.6 | 4.4 |
| 7/11/19 21:30 | 43.9 | 9  | GWN | 0.399  | 1.9 | 15.8 | 4.4 |
| 7/11/19 22:15 | 26.1 | 9  | GWN | 0.4097 | 2.2 | 15.7 | 3.8 |
| 7/11/19 23:00 | 18.2 | 9  | GWN | 0.4146 | 2.3 | 15.5 | 3.7 |
| 7/11/19 23:45 | 15.3 | 9  | GWN | 0.4268 | 2.2 | 14.2 | 4.6 |
| 7/12/19 0:30  | 12.4 | 9  | GWN | 0.4354 | 2.0 | 14.0 | 3.4 |
| 7/12/19 1:15  | 10.8 | 9  | GWN | 0.4506 | 2.8 | 13.6 | 4.0 |
| 7/12/19 2:00  | 9.3  | 9  | GWN | 0.4547 | 2.9 | 13.0 | 3.2 |
| 7/12/19 2:45  | 8.1  | 9  | GWN | 0.4621 | 2.5 | 12.4 | 3.3 |
| 7/12/19 5:45  | 4.9  | 9  | GWN | 0.4928 | 3.7 | 10.9 | 2.9 |
| 7/12/19 7:15  | 4.1  | 9  | GWN | 0.5004 | 4.2 | 10.1 | 1.9 |
| 7/12/19 8:45  | 3.6  | 9  | GWN | 0.5159 | 4.7 | 9.4  | 2.4 |
| 7/22/19 17:30 | 6.3  | 10 | GUN | 2.6436 | 6.3 | 2.2  | 0.8 |
| 7/22/19 19:00 | 5.6  | 10 | GUN | 2.6434 | 6.2 | 3.7  | 0.0 |
| 7/22/19 19:45 | 9.7  | 10 | GUN | 2.6548 | 6.0 | 4.1  | 0.2 |
| 7/22/19 20:30 | 21.3 | 10 | GUN | 2.7974 | 5.2 | 4.1  | 0.3 |
| 7/22/19 21:15 | 23.1 | 10 | GUN | 2.4194 | 5.6 | 4.9  | 0.6 |
| 7/22/19 22:00 | 20.3 | 10 | GUN | 1.7422 | 5.5 | 6.2  | 0.8 |
| 7/22/19 23:30 | 13.8 | 10 | GUN | 1.5579 | 5.2 | 5.3  | 1.0 |
| 7/23/19 1:00  | 9.6  | 10 | GUN | 1.5162 | 6.8 | 6.8  | 1.1 |
| 7/23/19 2:30  | 8.0  | 10 | GUN | 1.6195 | 6.0 | 5.5  | 0.6 |
| 7/23/19 3:15  | 9.4  | 10 | GUN | 1.575  | 5.8 | 6.1  | 1.4 |
| 7/23/19 4:00  | 14.9 | 10 | GUN | 1.5941 | 6.2 | 5.4  | 0.4 |

|                   |      |    |     |        |     |     |      |
|-------------------|------|----|-----|--------|-----|-----|------|
| 7/23/19 4:45      | 21.3 | 10 | GUN | 1.733  | 6.0 | 4.5 | 0.7  |
| 7/23/19 5:30      | 25.4 | 10 | GUN | 1.7484 | 6.4 | 5.0 | 0.6  |
| 7/23/19 6:15      | 27.2 | 10 | GUN | 1.6492 | 6.0 | 4.1 | -0.1 |
| 7/23/19 7:00      | 27.7 | 10 | GUN | 1.9003 | 6.2 | 4.5 | 0.5  |
| 7/23/19 7:45      | 26.3 | 10 | GUN | 1.6922 | 6.5 | 4.3 | 0.6  |
| 7/23/19 9:15      | 21.7 | 10 | GUN | 1.5075 | 6.0 | 4.1 | 0.5  |
| 7/23/19 10:45     | 17.2 | 10 | GUN | 1.425  | 5.0 | 4.5 | 0.7  |
| 7/23/19 17:15     | 10.7 | 10 | GUN | 2.1051 | 5.6 | 4.4 | 0.2  |
| 7/22/19 16:30     | 1.2  | 10 | GWN | 1.5458 | 7.7 | 7.5 | 1.4  |
| 7/22/19 17:15     | 1.6  | 10 | GWN | 1.6271 | 8.2 | 6.4 | 0.6  |
| 7/22/19 18:00     | 1.8  | 10 | GWN | 1.7912 | 8.9 | 6.1 | 1.1  |
| 7/22/19 18:45     | 1.3  | 10 | GWN | 1.7226 | 8.0 | 6.7 | 1.7  |
| 7/22/19 19:30     | 1.3  | 10 | GWN | 1.6032 | 7.6 | 7.5 | 1.6  |
| 7/22/19 20:15     | 2.4  | 10 | GWN | 1.5508 | 6.8 | 7.8 | 1.8  |
| 7/22/19 21:00     | 4.9  | 10 | GWN | 1.5711 | 7.0 | 7.0 | 1.2  |
| 7/22/19 21:45     | 4.7  | 10 | GWN | 1.7214 | 7.7 | 5.4 | 1.0  |
| 7/22/19 22:30     | 4.0  | 10 | GWN | 1.5925 | 7.0 | 6.7 | 1.1  |
| 7/23/19 10:45     | 3.8  | 10 | GWN | 0.6579 | 5.8 | 7.9 | 1.6  |
| 7/23/19 12:15     | 2.9  | 10 | GWN | 0.5908 | 6.3 | 8.6 | 1.9  |
| 7/23/19 13:45     | 2.3  | 10 | GWN | 0.5693 | 6.5 | 6.9 | 1.6  |
| 7/23/19 15:15     | 2.0  | 10 | GWN | 0.532  | 4.7 | 7.4 | 1.2  |
| 7/23/19 16:45     | 1.7  | 10 | GWN | 0.5218 | 7.2 | 7.5 | 1.2  |
| 10/16/19<br>11:30 | 2.2  | 11 | GUN | 2.8503 | 7.5 | 4.7 | -0.2 |
| 10/16/19<br>12:30 | 2.3  | 11 | GUN | 3.0919 | 6.3 | 4.3 | 0.6  |
| 10/16/19<br>13:30 | 2.7  | 11 | GUN | 2.6542 | 7.0 | 5.3 | 0.4  |

|                   |      |    |     |        |     |     |      |
|-------------------|------|----|-----|--------|-----|-----|------|
| 10/16/19<br>14:30 | 3.4  | 11 | GUN | 2.4925 | 7.1 | 4.7 | 0.2  |
| 10/16/19<br>15:30 | 4.1  | 11 | GUN | 2.453  | 7.9 | 4.9 | -0.1 |
| 10/16/19<br>16:30 | 4.4  | 11 | GUN | 2.3354 | 6.9 | 5.1 | 0.5  |
| 10/16/19<br>17:30 | 4.6  | 11 | GUN | 2.3001 | 6.7 | 2.4 | 0.9  |
| 10/16/19<br>18:30 | 5.3  | 11 | GUN | 2.3473 | 7.3 | 6.1 | -0.4 |
| 10/16/19<br>19:30 | 6.5  | 11 | GUN | 2.3506 | 7.2 | 5.5 | 0.4  |
| 10/16/19<br>20:30 | 9.1  | 11 | GUN | 2.4236 | 6.1 | 4.2 | 0.7  |
| 10/16/19<br>21:30 | 10.5 | 11 | GUN | 2.4615 | 6.8 | 3.6 | -0.1 |
| 10/16/19<br>22:30 | 10.6 | 11 | GUN | 2.6067 | 6.7 | 5.4 | 0.9  |
| 10/16/19<br>23:30 | 9.8  | 11 | GUN | 2.6868 | 5.9 | 3.6 | 0.7  |
| 10/17/19 0:30     | 8.7  | 11 | GUN | 2.6744 | 6.6 | 4.8 | 0.5  |
| 10/17/19 1:30     | 7.6  | 11 | GUN | 2.645  | 5.8 | 4.8 | 0.4  |
| 10/17/19 2:30     | 6.5  | 11 | GUN | 2.6359 | 6.4 | 2.7 | 0.6  |
| 10/17/19 3:30     | 5.8  | 11 | GUN | 2.6104 | 6.1 | 4.9 | 1.0  |
| 10/17/19 5:30     | 4.7  | 11 | GUN | 2.8481 | 5.3 | 3.9 | 1.0  |
| 10/17/19 7:30     | 4.0  | 11 | GUN | 2.6048 | 7.5 | 2.9 | 0.7  |
| 10/17/19 9:30     | 3.5  | 11 | GUN | 2.6228 | 6.0 | 3.5 | 0.3  |
| 10/17/19<br>12:00 | 3.2  | 11 | GUN | 2.605  | 4.9 | 5.3 | 0.7  |
| 10/16/19<br>13:00 | 0.7  | 11 | GWN | 1.5844 | 7.9 | 5.9 | 1.0  |

|                   |      |    |     |        |     |      |     |
|-------------------|------|----|-----|--------|-----|------|-----|
| 10/16/19<br>13:45 | 2.4  | 11 | GWN | 0.7846 | 6.3 | 12.1 | 3.1 |
| 10/16/19<br>14:30 | 8.6  | 11 | GWN | 0.9735 | 6.9 | 8.1  | 1.4 |
| 10/16/19<br>15:15 | 10.1 | 11 | GWN | 0.7647 | 6.0 | 10.2 | 2.9 |
| 10/16/19<br>16:00 | 11.0 | 11 | GWN | 0.5754 | 5.0 | 12.2 | 3.2 |
| 10/16/19<br>16:45 | 14.4 | 11 | GWN | 0.7113 | 5.6 | 8.6  | 2.3 |
| 10/16/19<br>17:30 | 18.4 | 11 | GWN | 1.1845 | 6.5 | 7.0  | 1.4 |
| 10/16/19<br>18:15 | 18.5 | 11 | GWN | 1.0188 | 5.8 | 8.8  | 1.6 |
| 10/16/19<br>19:00 | 17.4 | 11 | GWN | 1.2245 | 4.7 | 6.5  | 1.9 |
| 10/16/19<br>19:45 | 15.1 | 11 | GWN | 0.9308 | 4.8 | 6.0  | 1.9 |
| 10/16/19<br>20:30 | 11.6 | 11 | GWN | 0.7805 | 4.4 | 8.0  | 2.0 |
| 10/16/19<br>21:15 | 8.6  | 11 | GWN | 0.715  | 3.3 | 8.0  | 2.0 |
| 10/16/19<br>22:00 | 6.6  | 11 | GWN | 0.7056 | 3.7 | 7.8  | 2.2 |
| 10/16/19<br>22:45 | 5.1  | 11 | GWN | 0.7154 | 4.1 | 7.7  | 2.2 |
| 10/17/19 0:15     | 3.7  | 11 | GWN | 0.7219 | 3.2 | 7.5  | 2.0 |
| 10/17/19 1:45     | 2.8  | 11 | GWN | 0.7006 | 4.1 | 6.1  | 2.1 |
| 10/17/19 3:15     | 2.2  | 11 | GWN | 0.708  | 3.4 | 7.0  | 1.5 |
| 10/17/19 7:45     | 1.4  | 11 | GWN | 0.7314 | 4.5 | 6.4  | 1.0 |

Table S5. Nitrate concentration and isotope data and discharge for individual pre-event baseflow samples and monthly routine samples

| Date and Time      | Discharge<br>( $\text{m}^3 \text{s}^{-1}$ ) | Site | $\text{NO}_3^-$ (mg<br>$\text{N L}^{-1}$ ) | $\delta^{15}\text{N}$ (‰) | $\delta^{18}\text{O}$ (‰) | $\Delta^{17}\text{O}$ (‰) |
|--------------------|---------------------------------------------|------|--------------------------------------------|---------------------------|---------------------------|---------------------------|
| 1/3/2019 0000      | 17.4                                        | GUN  | 2.871                                      | 5.9                       | 2.6                       | 0.2                       |
| 10/16/2019<br>1130 | 2.1                                         | GUN  | 2.8503                                     | 7.5                       | 4.7                       | -0.2                      |
| 10/2/2018 0000     | 16.3                                        | GUN  | 2.4575                                     | 7.0                       | 2.9                       | 0.4                       |
| 10/26/2018<br>1515 | 6.5                                         | GUN  | 3.1987                                     | 6.5                       | 1.8                       | 0.7                       |
| 11/1/2018 0000     | 8.0                                         | GUN  | 2.8801                                     | 6.9                       | 2.9                       | 0.7                       |
| 12/27/2018<br>1800 | 14.0                                        | GUN  | 3.0308                                     | 5.3                       | 1.8                       | 0.0                       |
| 12/3/2018 0000     | 15.6                                        | GUN  | 2.7001                                     | 5.9                       | 2.2                       | 0.6                       |
| 2/4/2019 0000      | 12.8                                        | GUN  | 3.1907                                     | 4.8                       | 3.3                       | 0.5                       |
| 3/20/2019 1945     | 10.3                                        | GUN  | 3.2293                                     | 6.1                       | 3.3                       | 0.5                       |
| 3/5/2019 0000      | 13.5                                        | GUN  | 3.068                                      | 5.8                       | 2.4                       | 0.6                       |
| 4/2/2019 0000      | 12.5                                        | GUN  | 3.3432                                     | 5.6                       | 2.8                       | 0.2                       |
| 5/2/2019 0000      | 8.5                                         | GUN  | 3.2976                                     | 6.2                       | 3.6                       | 0.2                       |
| 5/4/2019 1800      | 9.7                                         | GUN  | 3.1931                                     | 6.1                       | 3.7                       | 0.1                       |
| 6/3/2019 0000      | 8.3                                         | GUN  | 3.2957                                     | 6.4                       | 3.7                       | 0.0                       |
| 7/11/2019 1600     | 7.6                                         | GUN  | 3.0092                                     | 6.9                       | 3.8                       | 0.4                       |
| 7/2/2019 0000      | 5.5                                         | GUN  | 3.1634                                     | 6.7                       | 3.4                       | 0.6                       |
| 7/22/2019 1900     | 5.6                                         | GUN  | 2.6434                                     | 6.2                       | 3.7                       | 0.0                       |
| 8/1/2019 0000      | 5.9                                         | GUN  | 3.0593                                     | 6.6                       | 3.8                       | 0.2                       |
| 9/4/2018 0000      | 8.6                                         | GUN  | 2.5264                                     | 7.3                       | 3.5                       | 0.4                       |
| 1/3/2019 0000      | 1.7                                         | GWN  | 1.8075                                     | 7.6                       | 2.5                       | 0.3                       |
| 10/16/2019<br>1300 | 0.7                                         | GWN  | 1.5844                                     | 7.9                       | 5.9                       | 1.0                       |
| 10/2/2018 0000     | 1.2                                         | GWN  | 1.72                                       | 8.7                       | 2.7                       | 0.9                       |



|                    |     |     |        |     |     |      |
|--------------------|-----|-----|--------|-----|-----|------|
| 10/26/2018<br>2145 | 0.9 | GWN | 1.8838 | 7.4 | 4.1 | 0.7  |
| 11/1/2018 0000     | 0.9 | GWN | 1.7973 | 8.3 | 2.4 | 0.0  |
| 12/28/2018<br>0300 | 1.4 | GWN | 2.1313 | 6.7 | 4.7 | 0.5  |
| 12/3/2018 0000     | 1.6 | GWN | 1.3706 | 7.5 | 5.0 | 1.0  |
| 2/4/2019 0000      | 1.4 | GWN | 2.3079 | 9.7 | 0.2 | 0.0  |
| 3/20/2019 1830     | 1.3 | GWN | 2.0393 | 6.8 | 2.9 | 0.9  |
| 3/5/2019 0000      | 2.2 | GWN | 1.3703 | 5.9 | 3.3 | 1.1  |
| 4/2/2019 0000      | 1.2 | GWN | 2.0227 | 7.2 | 5.4 | 0.4  |
| 5/2/2019 0000      | 1.0 | GWN | 1.9522 | 7.0 | 3.7 | -0.2 |
| 5/4/2019 2300      | 1.1 | GWN | 1.2949 | 7.6 | 7.4 | 1.3  |
| 6/3/2019 0000      | 0.3 | GWN | 1.4346 | 8.4 | 4.1 | 0.2  |
| 7/11/2019 1530     | 1.0 | GWN | 1.5733 | 7.3 | 3.0 | 0.7  |
| 7/2/2019 0000      | 0.6 | GWN | 1.6625 | 8.2 | 5.0 | 0.7  |
| 8/1/2019 0000      | 0.6 | GWN | 1.7765 | 9.1 | 4.9 | 0.7  |
| 9/4/2018 0000      | 0.6 | GWN | 1.7249 | NA  | 3.2 | 0.2  |

*Supplementary figures*

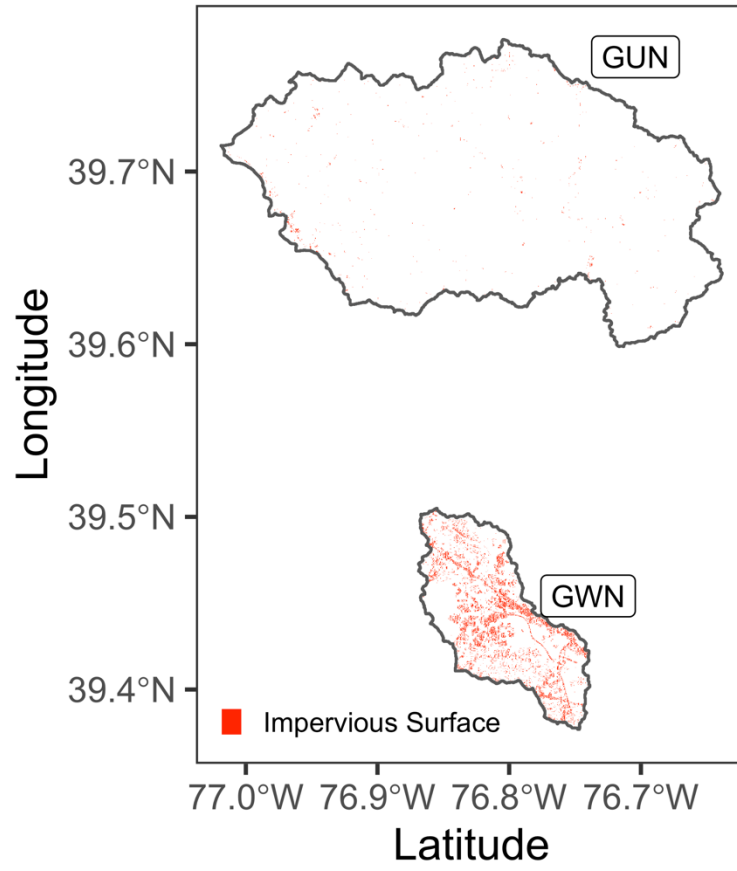

Figure S1. Watershed map showing impervious surfaces in Gunpowder Falls

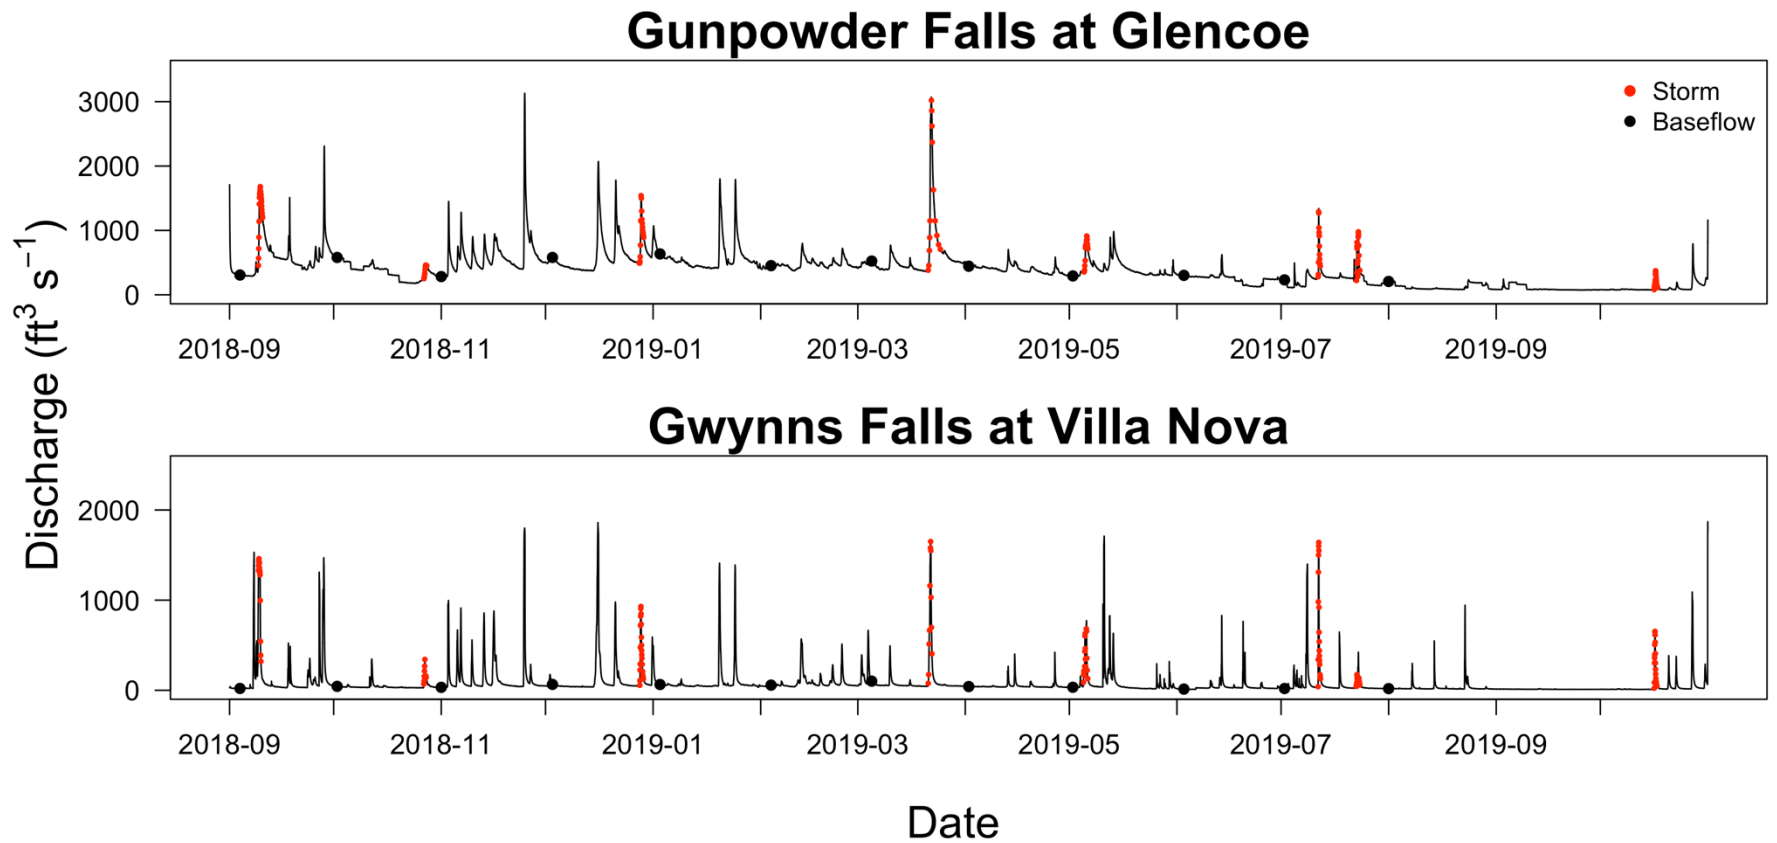

Figure S2. Hydrographs from September 2018 – October 2019 showing baseflow samples (black dots) and storm samples (red dots) for both watersheds.

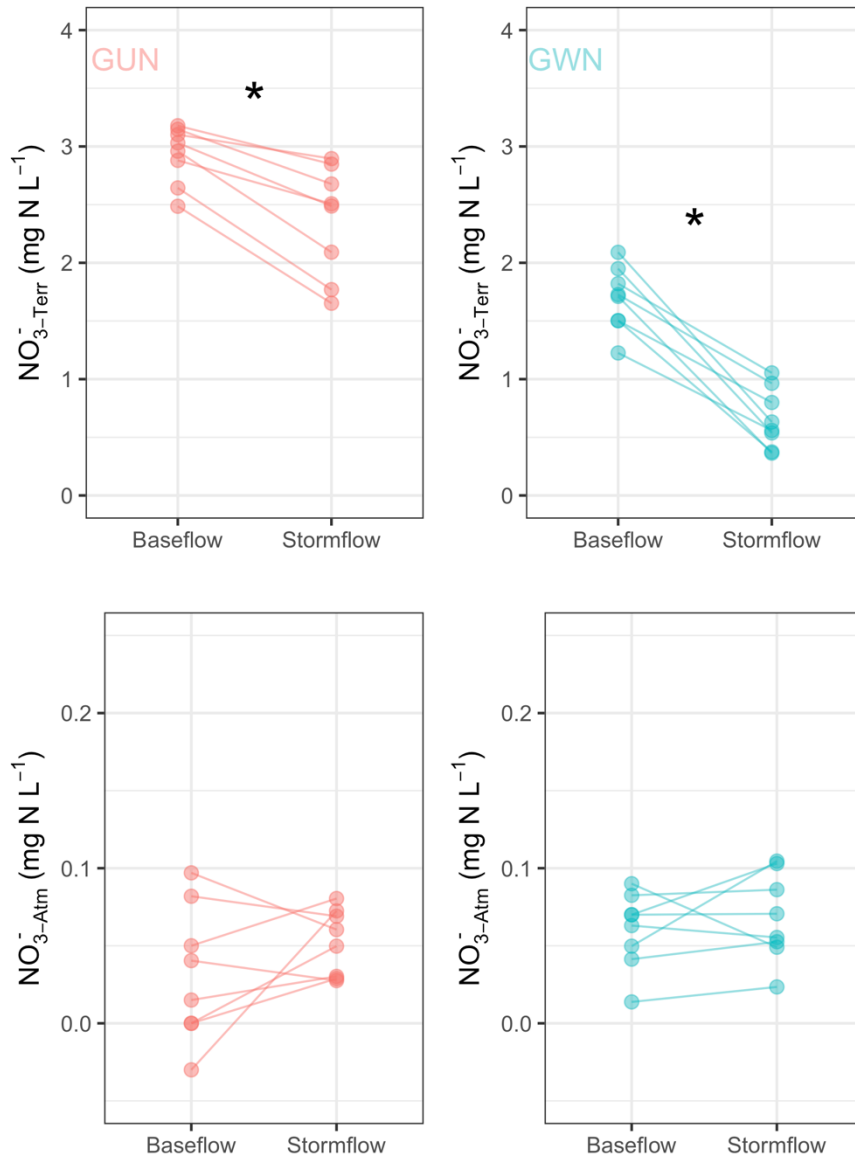

Figure S3. Baseflow and event mean concentrations (“Stormflow”) for  $\text{NO}_3^-$ -Terr and  $\text{NO}_3^-$ -Atm. The asterisk (\*) indicates a significant difference at  $p < 0.05$ .

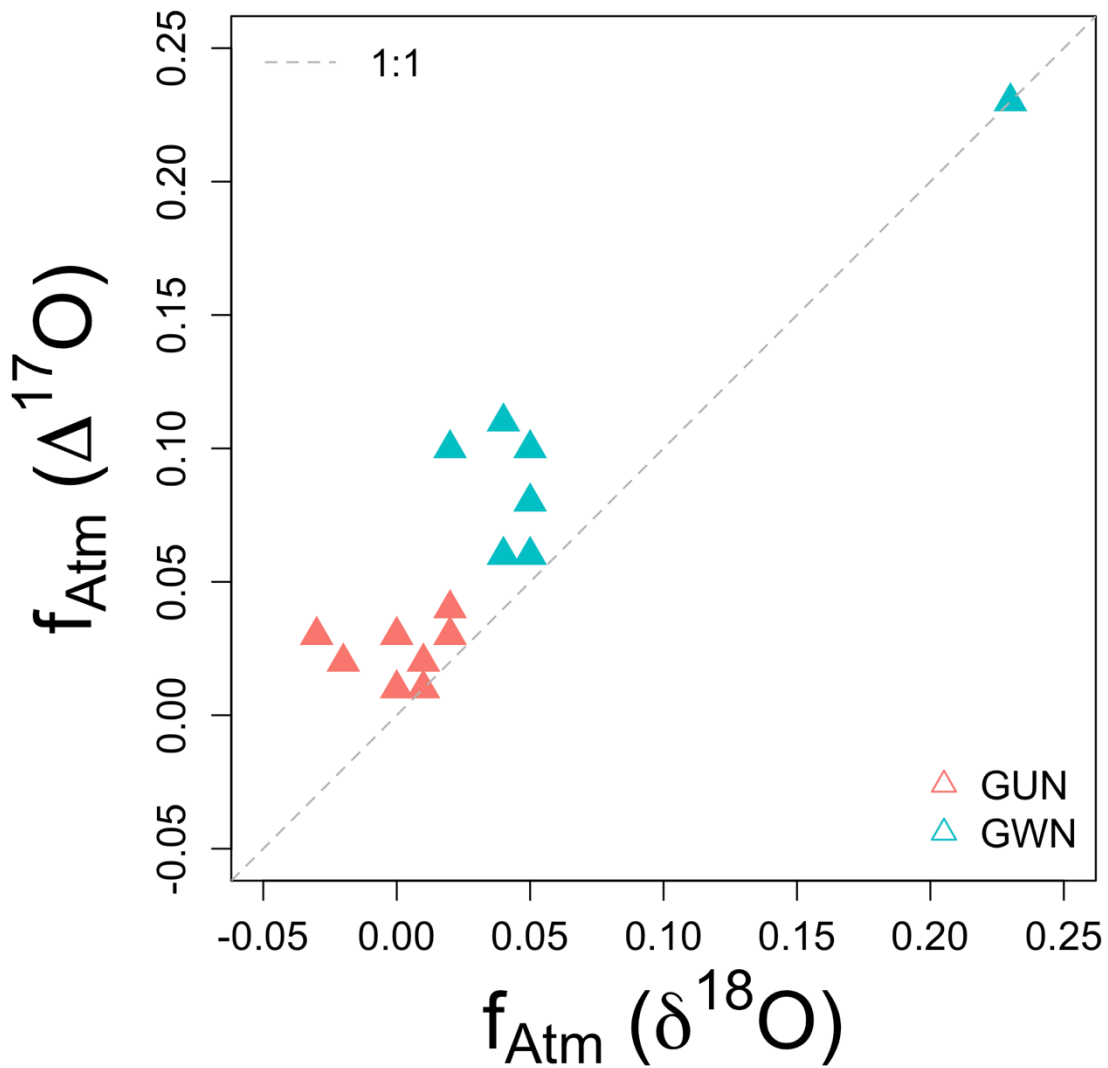

Figure S4. Average event fraction of unprocessed atmospheric NO<sub>3</sub><sup>-</sup> (f<sub>Atm</sub>) as calculated using Δ<sup>17</sup>O and δ<sup>18</sup>O. Triangles above the dashed grey 1:1 line indicate f<sub>Atm</sub> is underestimated by δ<sup>18</sup>O.
